# Supplementary material for: Assessment of the impact of intravenous antibiotics treatment on gut microbiota in patients: Clinical data from pre-and post-cardiac surgery
Source: PubMed Central journal article supplement (PMC9896080; doi:10.3389/fcimb.2022.1043971), 2023-01-19
Supplement: Image_1.pdf [file Image_1.pdf]

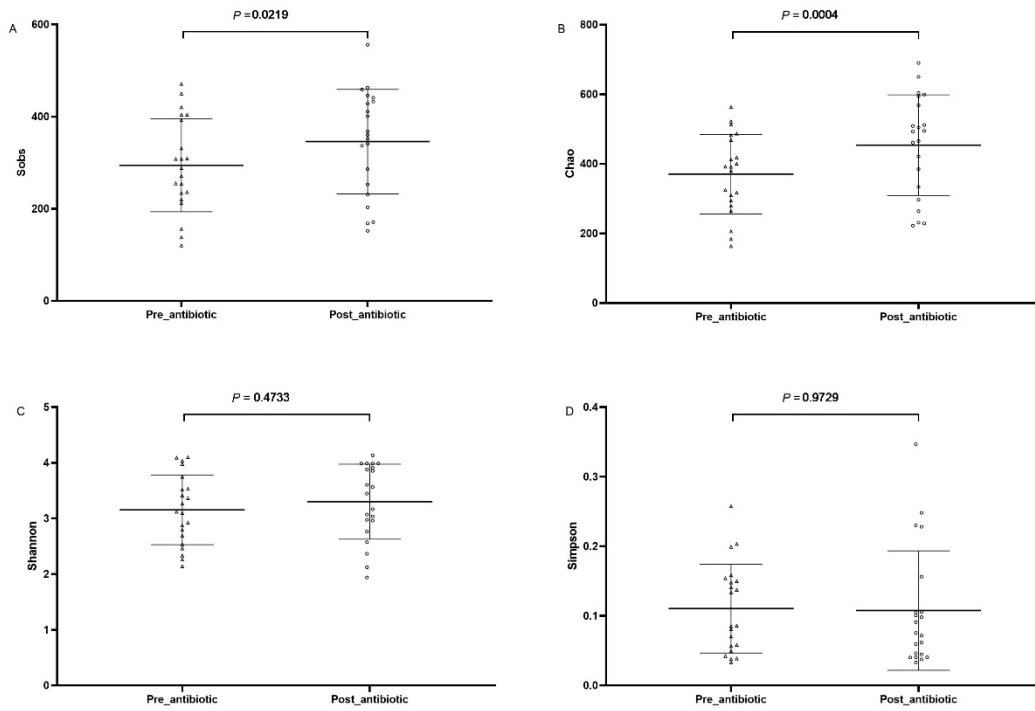

**Figure S1.** The community richness and diversity for cefuroxime treatment. A: *Sobs* index; B: *Chao* index; C: *Shannon* index; D: *Simpson* index.

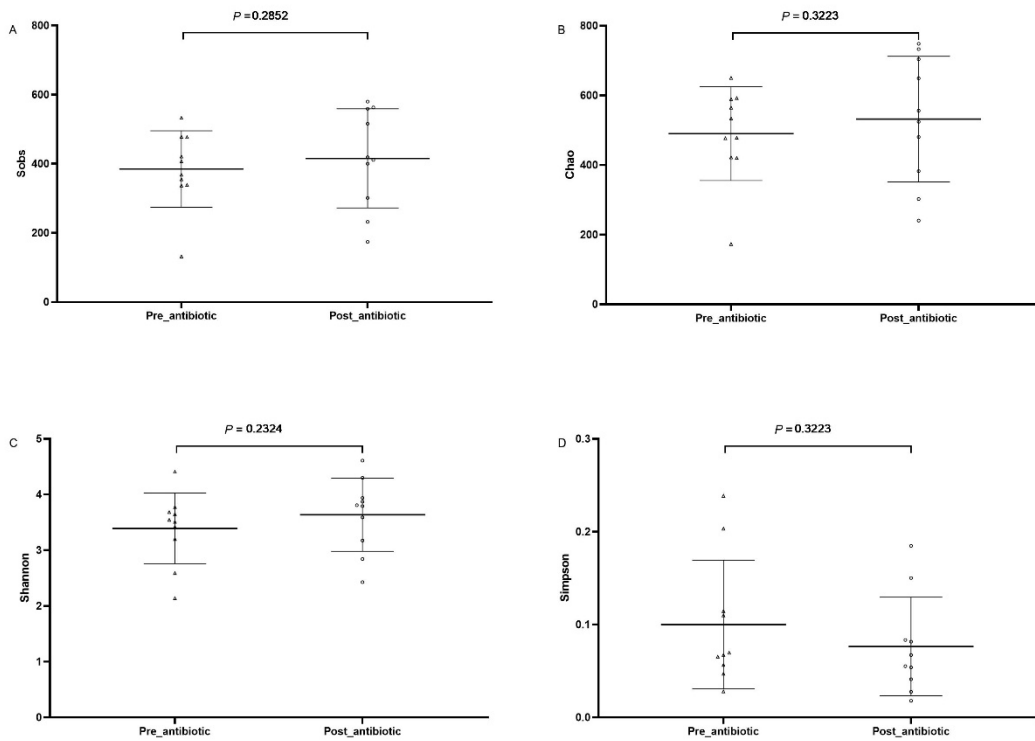

**Figure S2.** The community richness and diversity for ceftazidime treatment. A: *Sobs* index; B: *Chao* index; C: *Shannon* index; D: *Simpson* index.

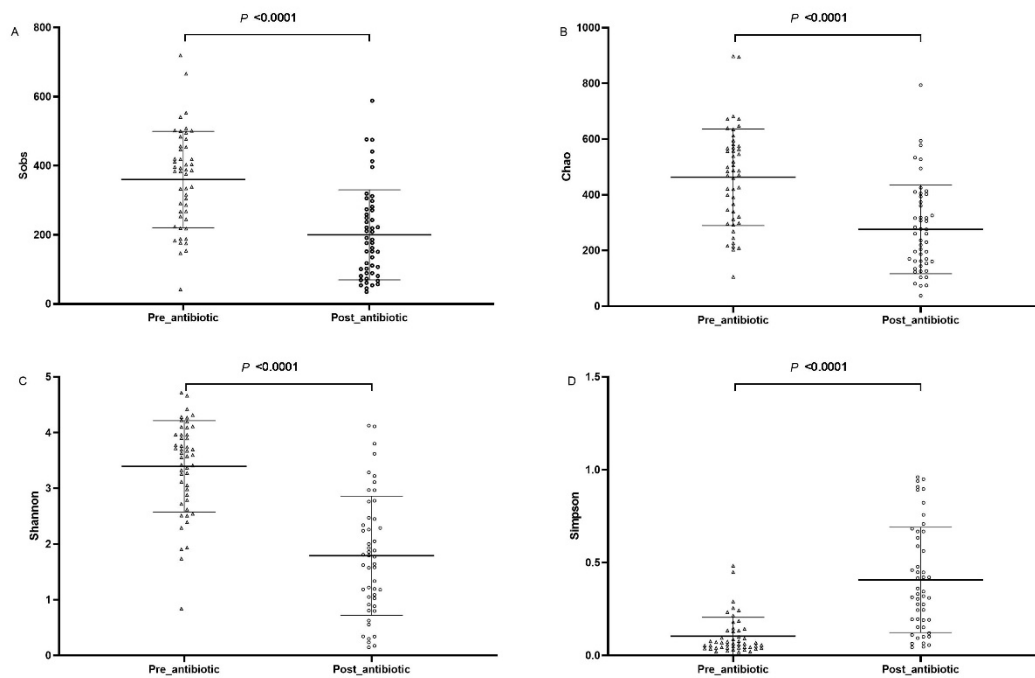

**Figure S3** The community richness and diversity for sulperazone treatment. A: *Sobs* index; B: *Chao* index; C: *Shannon* index; D: *Simpson* index.

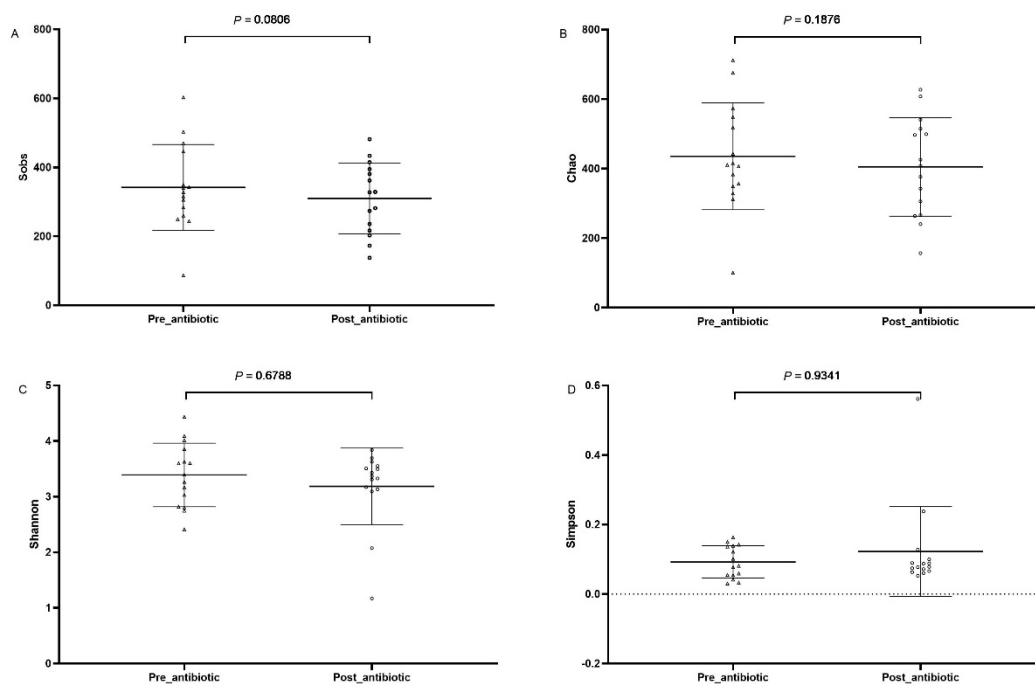

**Figure S4.** The community richness and diversity for tienam treatment. A: *Sobs* index; B: *Chao* index; C: *Shannon* index; D: *Simpson* index.

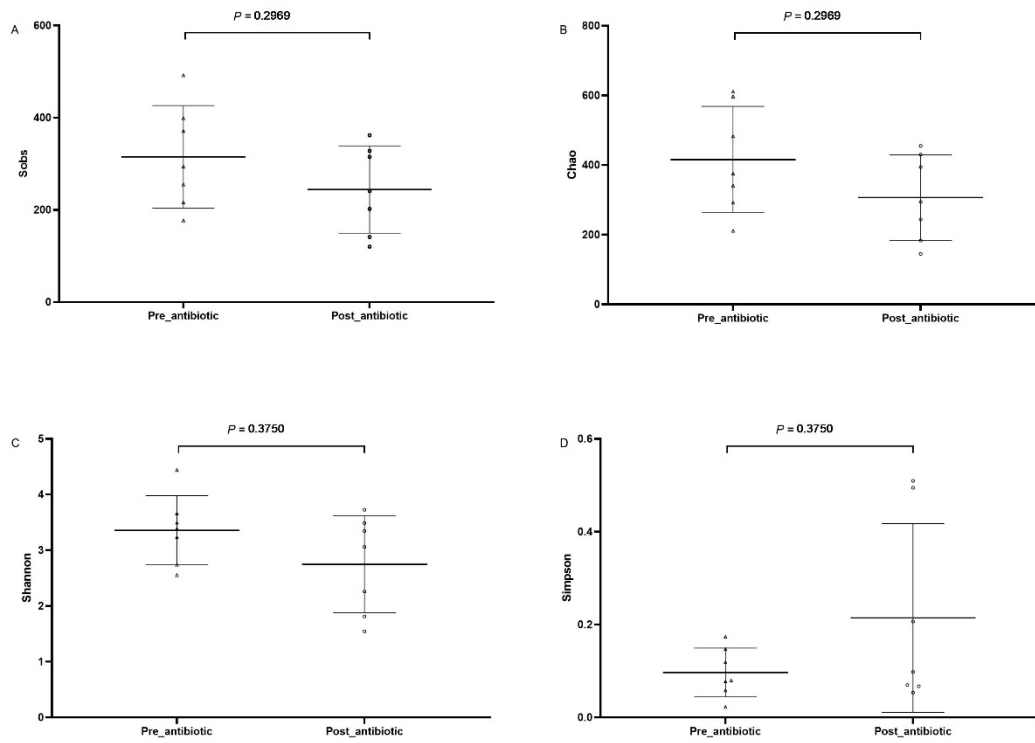

**Figure S5.** The community richness and diversity for meropenem treatment. A: *Sobs* index; B: *Chao* index; C: *Shannon* index; D: *Simpson* index.

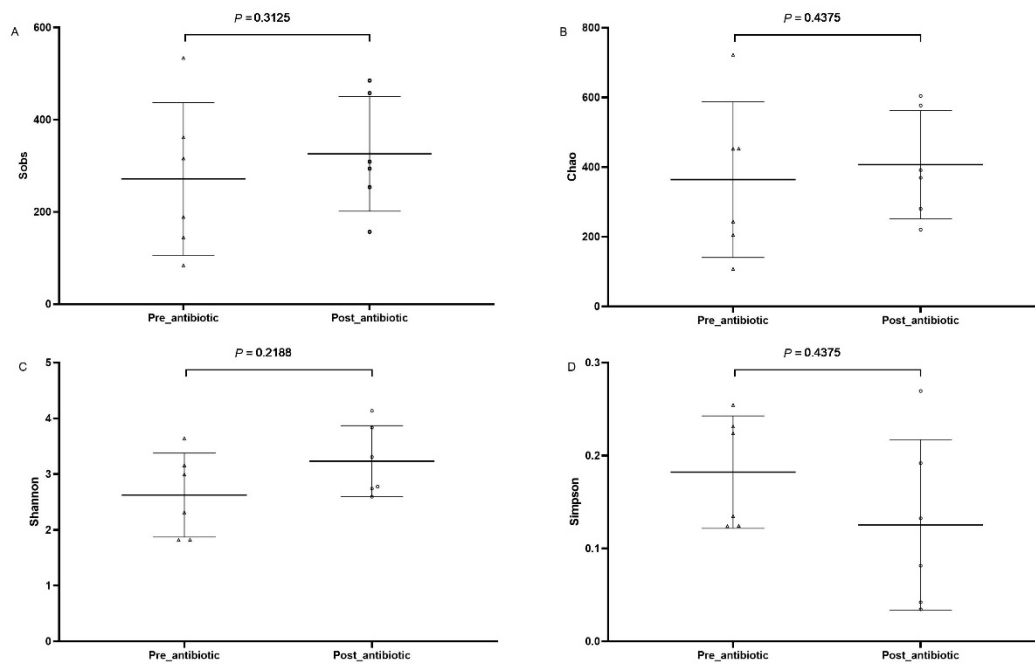

**Figure S6.** The community richness and diversity for quinolones treatment. A: *Sobs* index; B: *Chao* index; C: *Shannon* index; D: *Simpson* index.

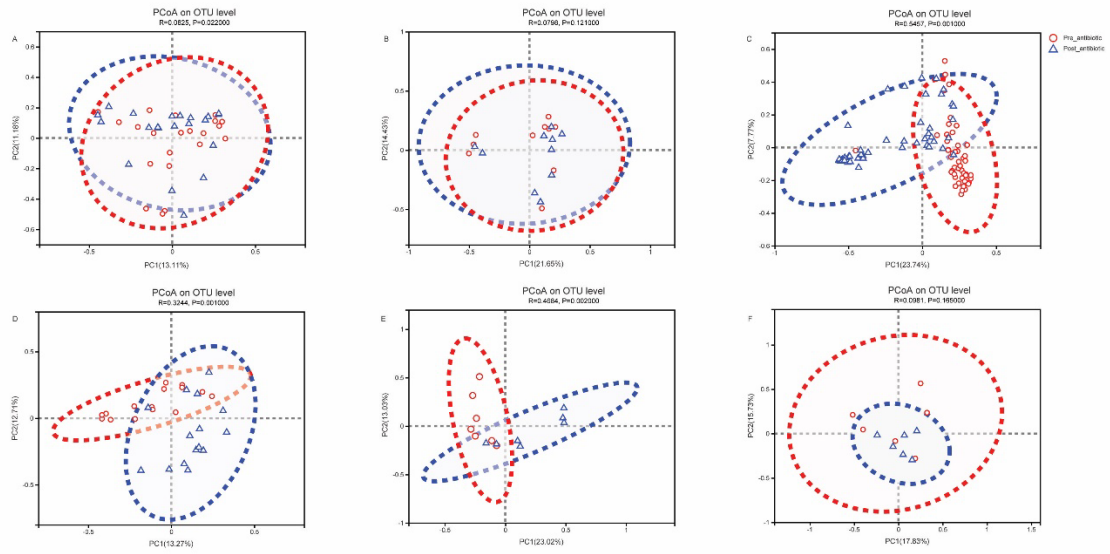

**Figure S7.** PCoA (principal coordinates analysis) of gut microbiota for different single antibiotic treatments. A: cefuroxime; B: ceftazidime; C: sulperazone; D: tienam; E: meropenem; F: quinolones. The dotted line represents the 95% confidence interval line.

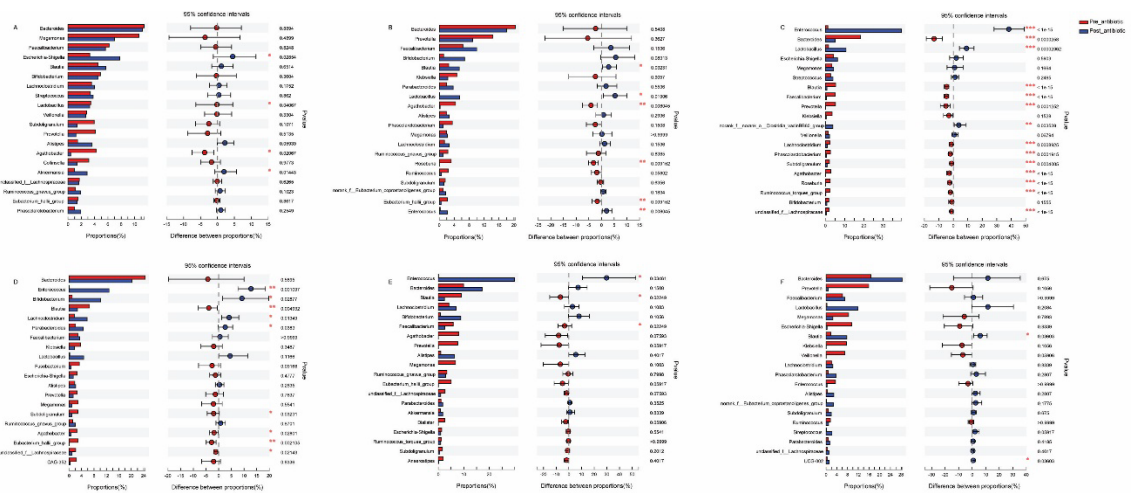

**Figure S8.** Comparison of the top 20 bacterial species for different single antibiotic treatments. A: cefuroxime; B: ceftazidime; C: sulperazone; D: tienam; E: meropenem; F: quinolones.

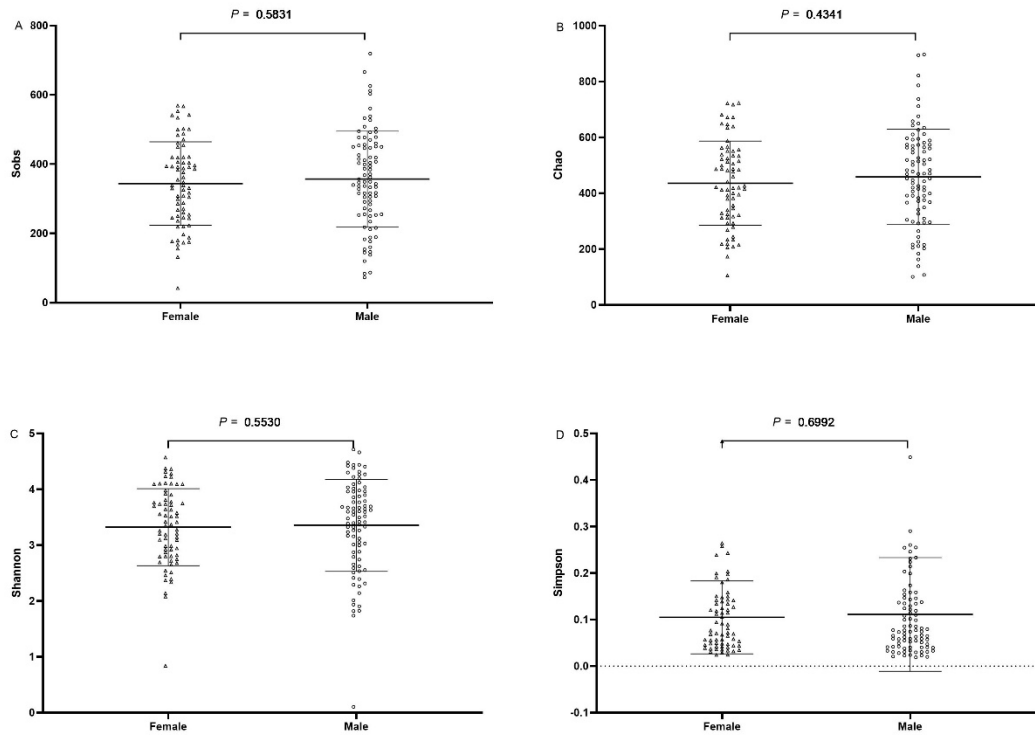

**Figure S9.** The community richness and diversity of gut microbiota for sex. A: *Sobs* index; B: *Chao* index; C: *Shannon* index; D: *Simpson* index.

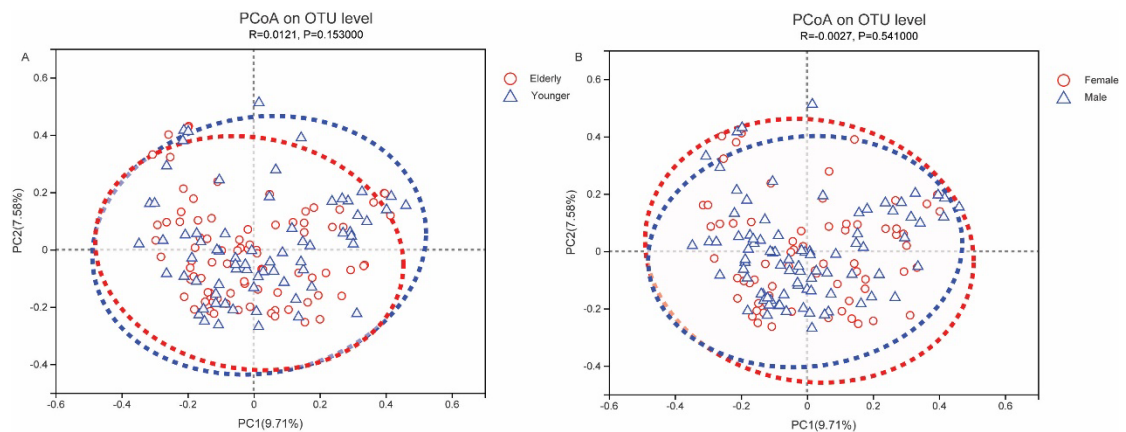

**Figure S10.** PCoA (principal coordinates analysis) of gut microbiota for age and sex. A: age; B: sex. The dotted line represents the 95% confidence interval line.

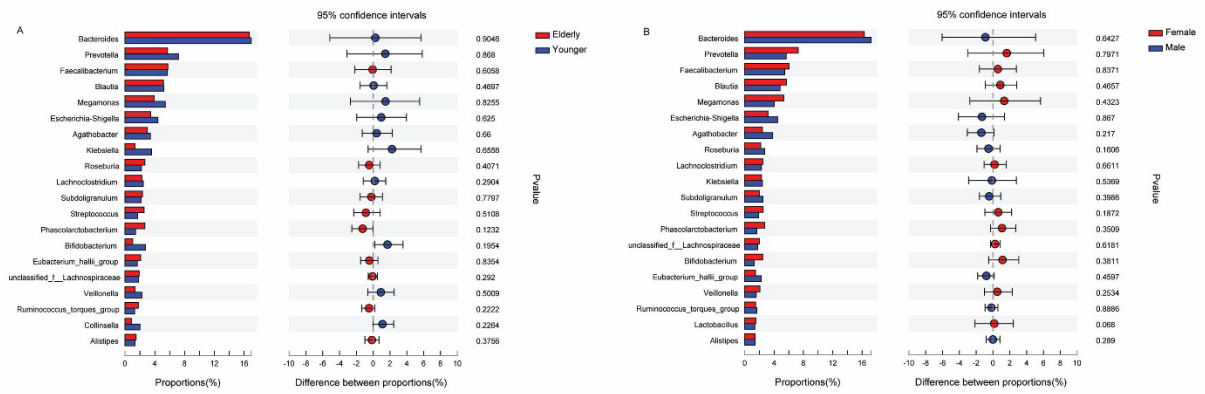

**Figure S11.** Comparison of the top 20 bacterial species between age and sex. A: age; B: sex.

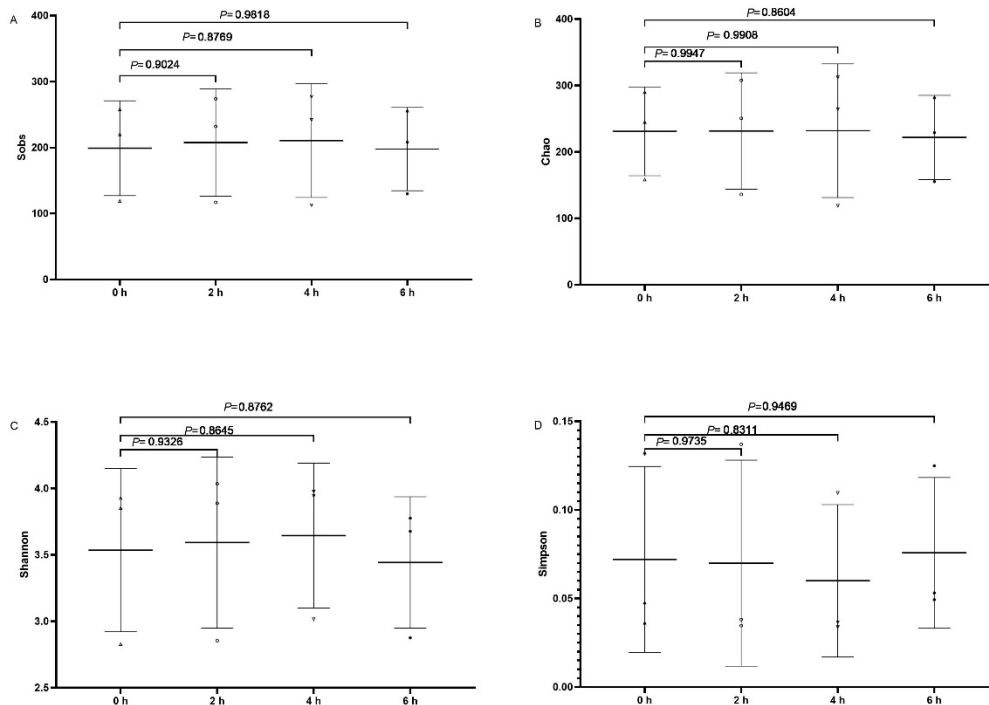

**Figure S12.** The community richness and diversity of gut microbiota for healthy volunteers. A: *Sobs* index; B: *Chao* index; C: *Shannon* index; D: *Simpson* index.

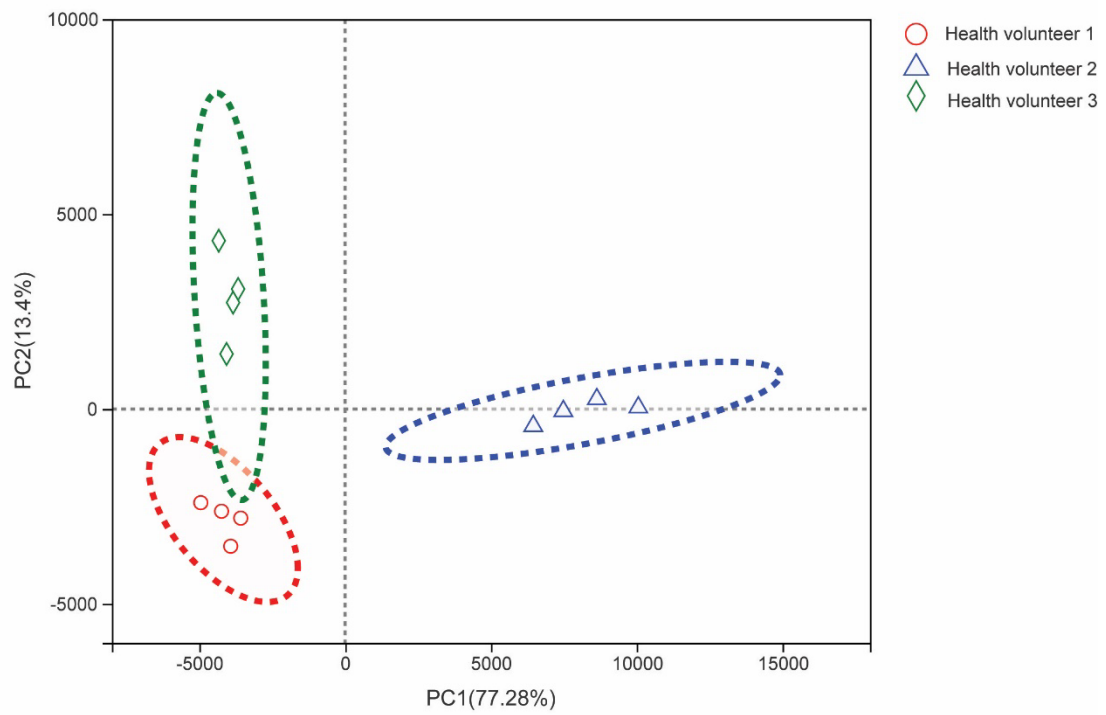

**Figure S13.** PCoA (principal coordinates analysis) of gut microbiota for healthy volunteers. The dotted line represents the 95% confidence interval line.

### Kruskal-Wallis H test bar plot

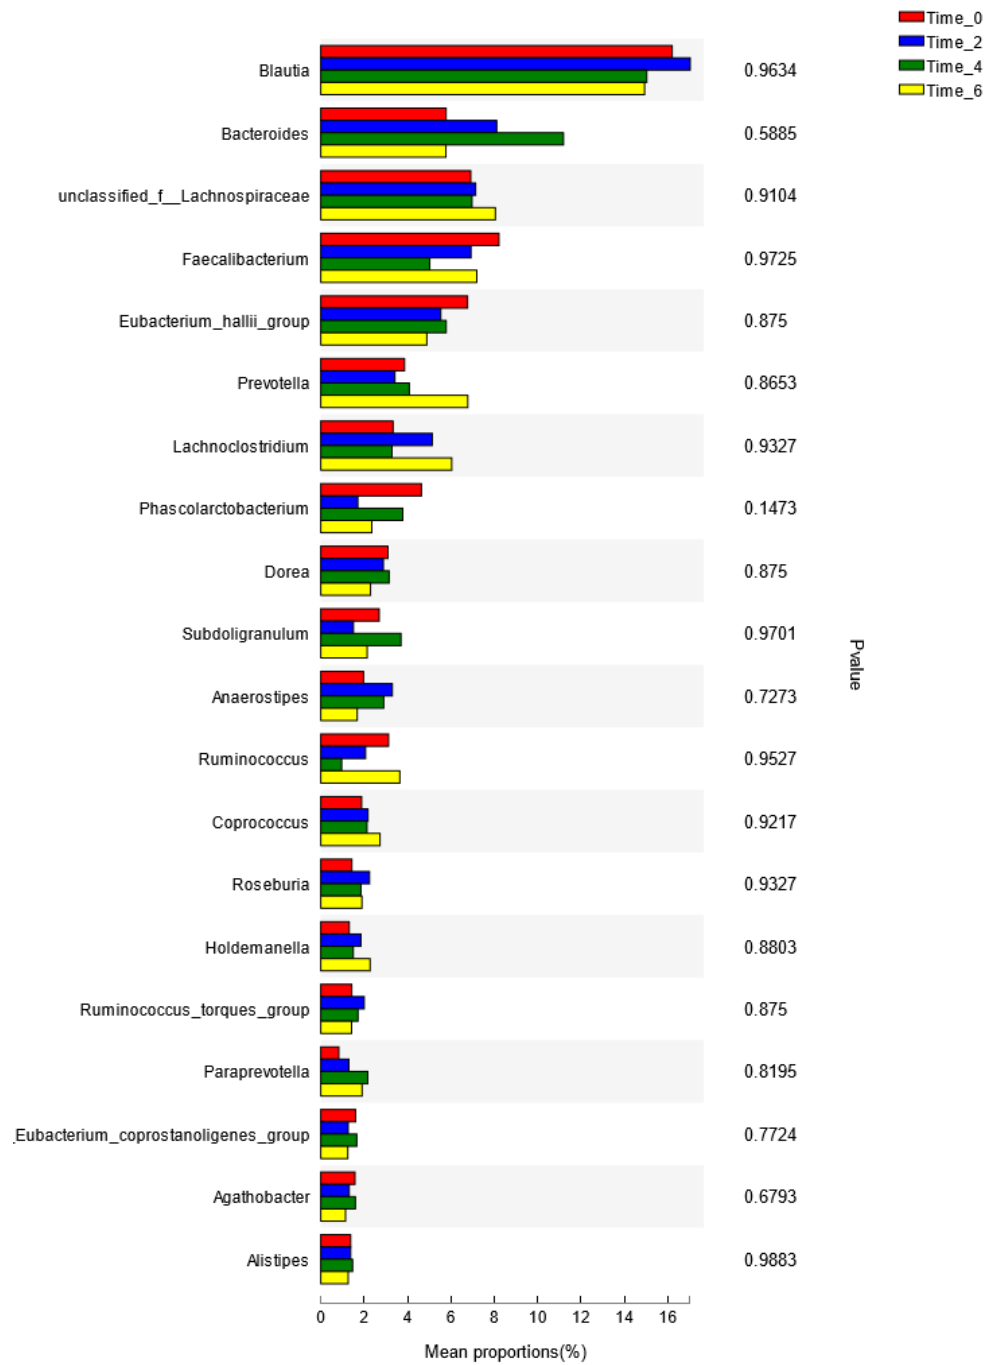

**Figure S14.** Comparison of the top 20 bacterial species for healthy volunteers.



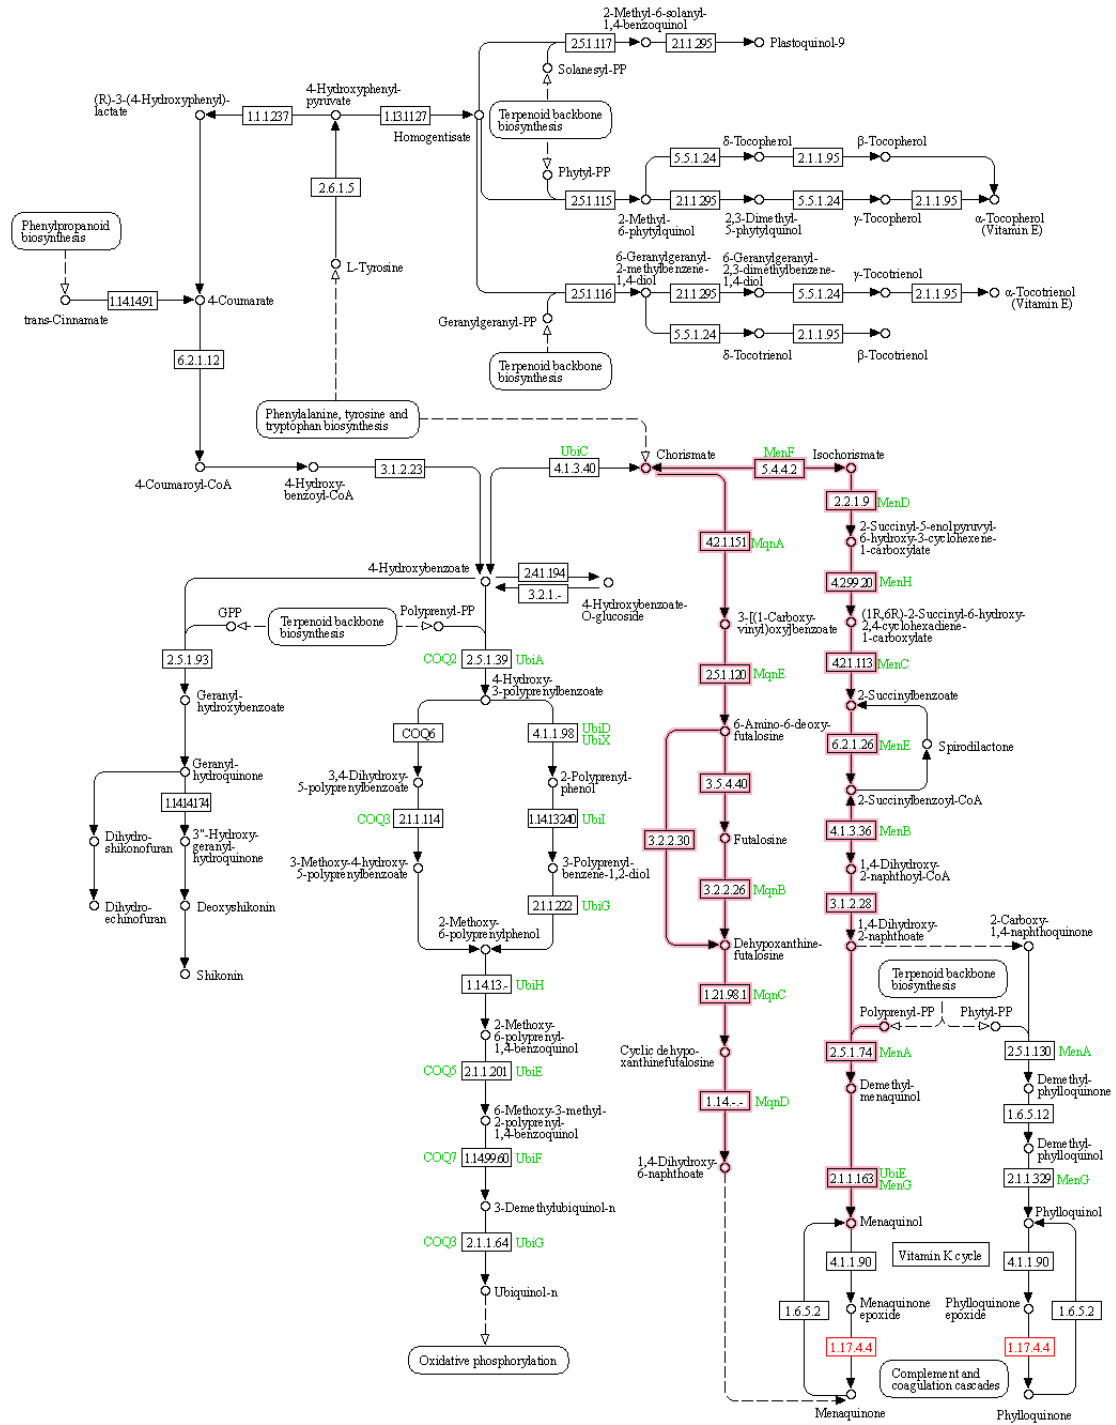

**Figure S15.** The pathway modules of menaquinone biosynthesis with the highlighted red line.
